# Supplementary material for: Differentiation between Impacted and Unimpacted Microbial Communities of a Nitrogen Contaminated Aquifer
Source: MDPI journal article supplement (doi:10.3390/environments9100128), 2022-10-09
Supplement: s1 [file s1]

**Table S1:** Methods of analysis used by ALS [20].

| Analyte                                                                    | NATA Method      |
|----------------------------------------------------------------------------|------------------|
| Alkalinity                                                                 | WD037            |
| Chloride                                                                   | WD045G           |
| Ion Balance                                                                | # APHA 1030E     |
| MS Soluble Metals                                                          | WG020A           |
| MS Total Metals                                                            | WG020A           |
| NH <sub>3</sub> as N (DA)                                                  | WK055G           |
| NO <sub>3</sub> -N                                                         | EK058GV          |
| SO <sub>4</sub> DA                                                         | WD041G           |
| Ca <sup>2+</sup> , Mg <sup>2+</sup> , K <sup>+</sup> , and Na <sup>+</sup> | WG005A; EA065-69 |
| TDS at 180°C +/- 5°C                                                       | WA015            |

**Table S2:** R studio packages used throughout analysis.

|            |                                                                         |                     |                                                                                                       |
|------------|-------------------------------------------------------------------------|---------------------|-------------------------------------------------------------------------------------------------------|
| Bar graphs | ggplot2<br>RColorBrewer                                                 | Data frame assembly | BiocManager<br>dada2<br>phyloseq<br>DECIPHER<br>DESeq2<br>doParallel<br>R.utils<br>dplyr<br>tidyverse |
| Statistics | edgeR<br>fossil<br>adespatial<br>ade4<br>devtools<br>Vegan<br>tidyverse |                     | tibble<br>readxl<br>tidyr                                                                             |
| CCA        | vegan<br>RColorBrewer                                                   |                     |                                                                                                       |
